# Supplementary material
Source: publisher site journal article supplement (https://www.dovepress.com/article/350609)
Supplement: Supplementary file 1 [file get_supplementary_file.php]

Table S1 Primer sequences

| Gene | Primers |
| --- | --- |
| GAPDH | Forward: 5’-CTCCTCCTGTTCGACAGTCAGC-3’ |
| Reverse: 5’-CCCAATACGACCAAATCCGTT-3’ |
| ALCAM | Forward: 5’-TGAGGCAGACGAGATAAGTGATGA-3’ |
| Reverse: 5’- ACCGAGGTCCTTGTTTACATGTTT-3’ |

ALCAM, activated leukocyte cell adhesion molecule； GAPDH, glyceraldehyde-3-phosphate dehydrogenase


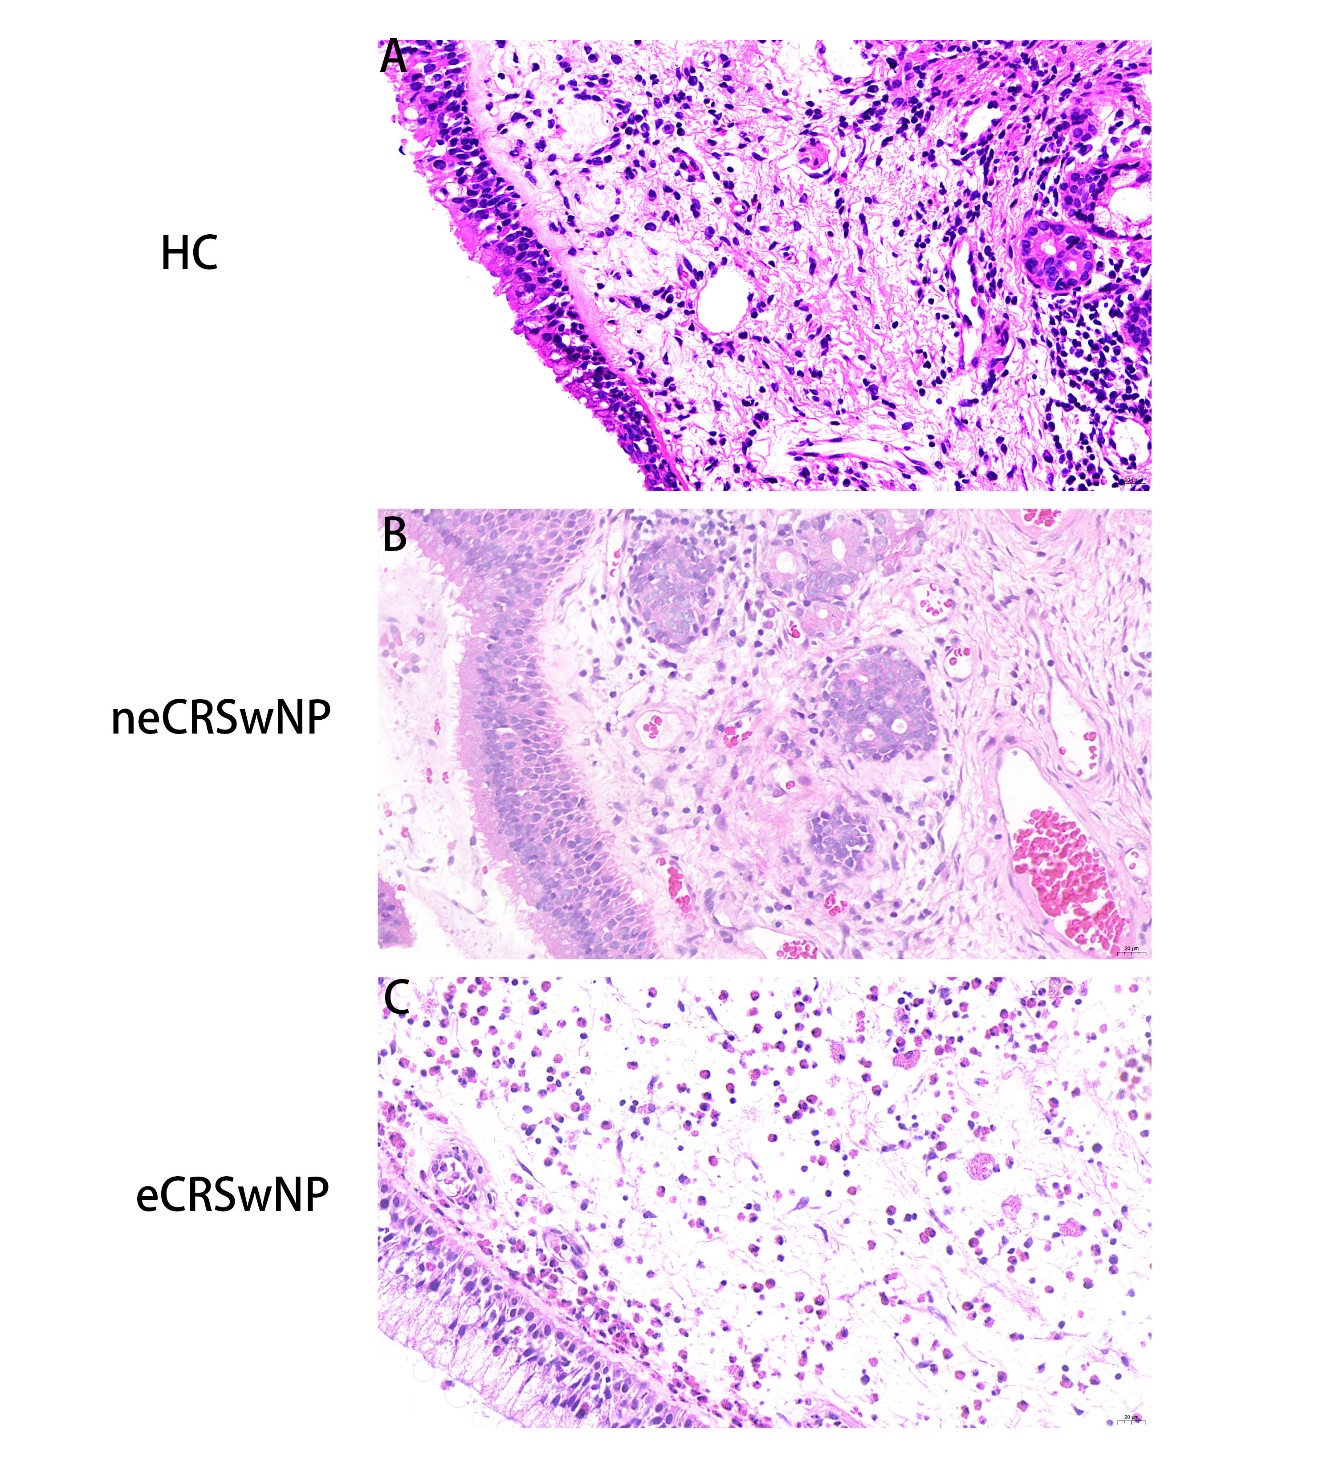


**Figure S1.** Representative H&E staining of eCRSwNP, neCRSwNP, and HC. (A) eCRSwNP, (B) neCRSwNP, (C) HC. eCRSwNP, eosinophilic chronic rhinosinusitis with nasal polyps; neCRSwNP, non-eosinophilic chronic rhinosinusitis with nasal polyps; HC, healthy control; H&E, hematoxylin and eosin; HPF, high-power field
